# Supplementary material
Source: PubMed Central journal article supplement (PMC7747164)
Supplement: JCB899377_Supplemental_Figure.pdf [file JCB899377_Supplemental_Figure.pdf]

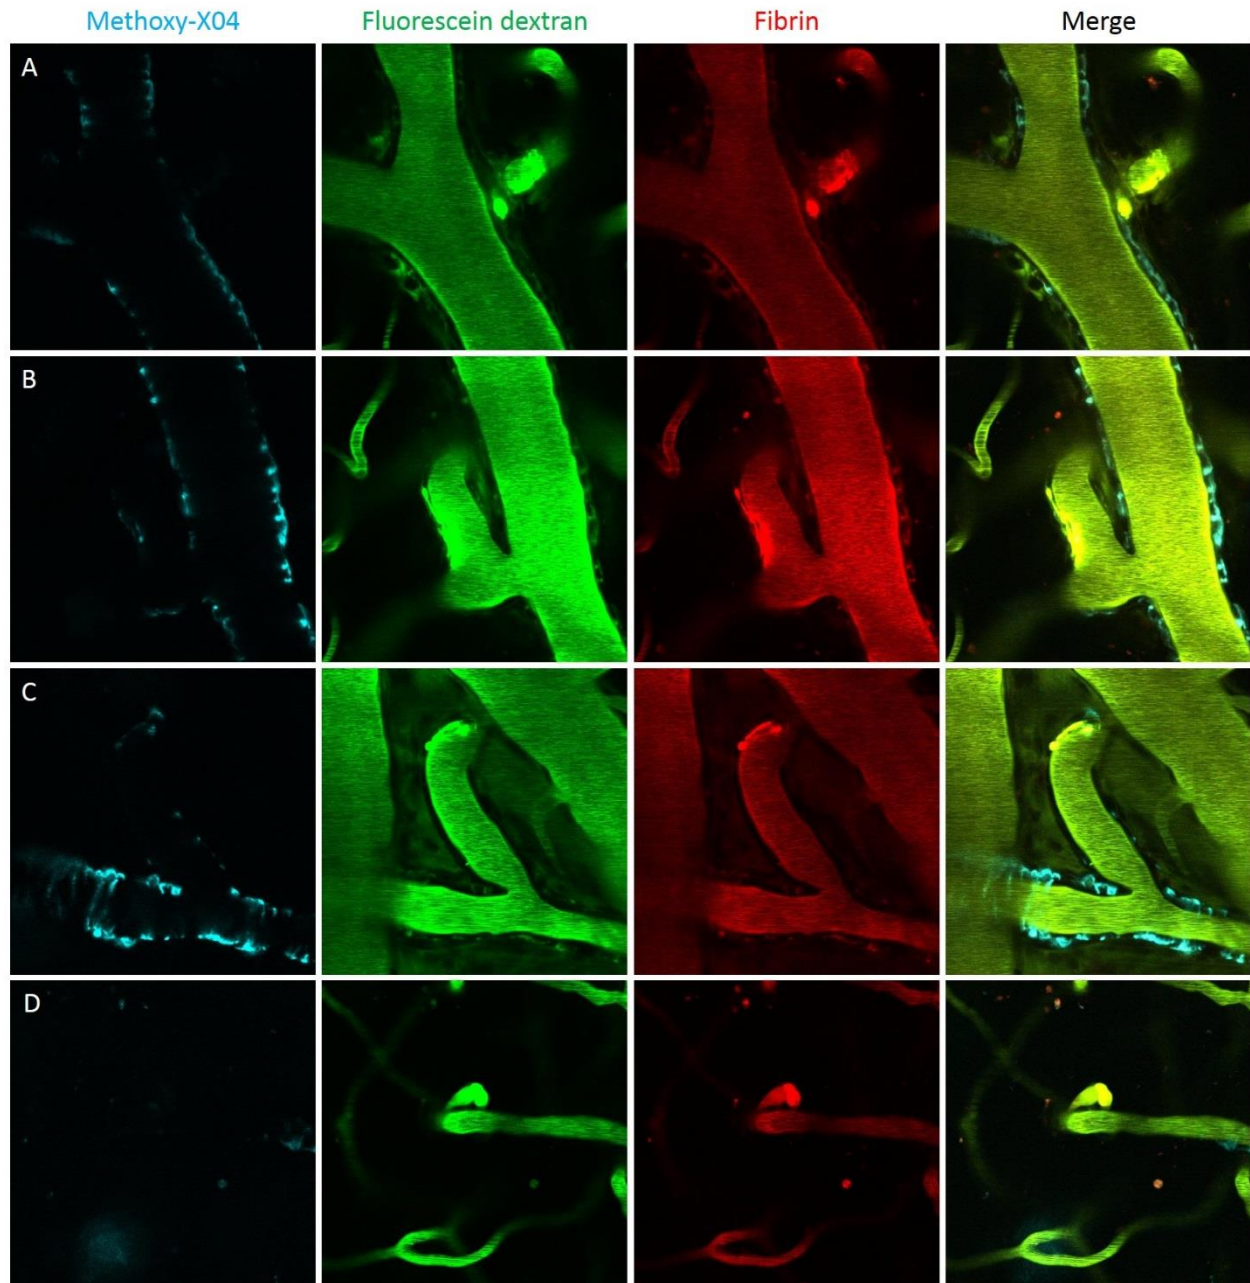

**Supplemental Figure 1.** Spontaneous leakage sites in 19-month-old Tg APP/PS1 mice.

Depicted are separate single slices from the Methoxy-X04 (blue) channel, fluorescein dextran (green) channel, and fibrin (red) channel, as well as the resulting merged image of the examples in Figure 4.
